# Supplementary material for: Cross-disorder genomic structural equation modeling reveals common genetic basis of neuroimmune diseases
Source: Research Square preprint supplement (doi:10.21203/rs.3.rs-7328766/v1), 2025-08-22
Supplement: Supplementary file 2 [file 3cd369aee692ee5bcea3ef85.xlsx]

## Sheet: Sheet1
No	GenomicLocus	uniqID	rsID	chr	pos	p	nIndSigSNPs	IndSigSNPs
32	32	17:65584101:C:T	rs76210604	17	65584101	1e-200	1	rs76210604
2	2	1:27471887:C:T	rs76692181	1	27471887	1e-200	1	rs76692181
16	16	4:177254572:A:G	rs10029041	4	177254572	1e-200	1	rs10029041
34	34	19:49672829:C:T	rs148729815	19	49672829	1e-200	1	rs148729815
18	18	5:19866975:C:T	rs180690604	5	19866975	1e-200	1	rs180690604
24	24	9:102811758:A:T	rs55691991	9	102811758	1e-200	1	rs55691991
7	7	2:51453952:A:G	rs72832112	2	51453952	1e-200	1	rs72832112
8	8	2:109761834:C:G	rs146179548	2	109761834	1e-200	1	rs146179548
25	25	11:39926692:C:T	rs71482185	11	39926692	1e-200	1	rs71482185
10	10	3:29434041:C:T	rs141245276	3	29434041	1e-200	1	rs141245276
11	11	3:143296624:A:G	rs6776465	3	143296624	1e-200	1	rs6776465
12	12	4:7532184:C:T	rs151224098	4	7532184	1e-200	1	rs151224098
26	26	12:109618591:G:T	rs73191114	12	109618591	1e-200	1	rs73191114
28	28	14:32428667:A:G	rs17098406	14	32428667	1e-200	1	rs17098406
17	17	5:16057480:A:G	rs115385547	5	16057480	1.14455698976e-198	1	rs115385547
4	4	1:85738953:A:G	rs114362702	1	85738953	1.84515916763e-173	1	rs114362702
5	5	1:220827883:A:G	rs111996812	1	220827883	1.34479711423e-169	1	rs111996812
3	3	1:27901368:C:T	rs78542455	1	27901368	2.37061272336e-139	1	rs78542455
30	30	16:11486668:C:T	rs11074971	16	11486668	1.23382081453e-129	1	rs11074971
33	33	19:33149523:A:G	rs77511911	19	33149523	5.98755207319e-104	1	rs77511911
31	31	16:90081235:A:G	rs34891292	16	90081235	3.79469803714e-96	1	rs34891292
6	6	2:5577275:G:T	rs73913776	2	5577275	3.05226828192e-65	1	rs73913776
1	1	1:19413544:A:C	rs55710223	1	19413544	3.0588292767e-63	1	rs55710223
23	23	8:107408282:C:T	rs72678550	8	107408282	8.93364220903e-61	1	rs72678550
9	9	2:198639353:C:T	rs77952266	2	198639353	1.08228018205e-45	1	rs77952266
19	19	7:133454333:A:C	rs1895024	7	133454333	6.78360397441e-29	1	rs1895024
29	29	15:31677984:C:T	rs4389106	15	31677984	1.25735795043e-22	1	rs4389106
27	27	13:56825502:A:G	rs9537344	13	56825502	2.83244135869e-22	1	rs9537344
35	35	21:45289700:C:T	rs1573474	21	45289700	1.65384441058e-20	1	rs1573474
