# Supplementary material for: Cross-disorder genomic structural equation modeling reveals common genetic basis of neuroimmune diseases
Source: Research Square preprint supplement (doi:10.21203/rs.3.rs-7328766/v1), 2025-08-22
Supplement: Supplementary file 5 [file b6a8f63735ad65513c66eac7.xlsx]

## Sheet: Sheet1
Exposure	Method	nSNP	P.val	or	or_lci95	or_uci95
CTLA4	MR Egger	18	0.621414	0.96411	0.836269	1.11149
	Weighted median	18	0.0166691	0.91652	0.853387	0.984323
	Inverse variance weighted	18	0.000532134	0.90806	0.859835	0.958989
	Simple mode	18	0.0799103	0.909256	0.822638	1.00499
	Weighted mode	18	0.0666726	0.918701	0.843989	1.00003
	MRConMix	18	0.00111286	0.897601	0.624863	1.28938
CCR5	MR Egger	47	0.321507	0.976635	0.932516	1.02284
	Weighted median	47	0.113524	0.977612	0.950577	1.00542
	Inverse variance weighted	47	0.00347136	0.969857	0.950153	0.98997
	Simple mode	47	0.0933393	0.958198	0.912522	1.00616
	Weighted mode	47	0.196591	0.974586	0.937771	1.01285
	MRConMix	47	0.00516033	0.967825	0.761899	1.22941
TYK2	MR Egger	57	0.924465	1.00202	0.961341	1.04441
	Weighted median	57	0.432411	0.988991	0.962031	1.01671
	Inverse variance weighted	57	0.0078063	0.974026	0.955322	0.993096
	Simple mode	57	0.0722198	0.955181	0.90946	1.0032
	Weighted mode	57	0.577938	0.989831	0.955026	1.0259
	MRConMix	57	0.0105945	0.962039	0.719362	1.28658
LILRA2	MR Egger	48	0.359133	1.00882	0.990244	1.02775
	Weighted median	48	0.117074	1.01233	0.996933	1.02796
	Inverse variance weighted	48	0.0313839	1.01149	1.00102	1.02208
	Simple mode	48	0.175703	1.0171	0.992811	1.04198
	Weighted mode	48	0.307134	1.00969	0.991378	1.02833
	MRConMix	48	0.0170845	1.0108	0.877666	1.16414
BDH2	MR Egger	68	0.550724	1.0055	0.987627	1.02371
	Weighted median	68	0.263745	1.00922	0.993107	1.02559
	Inverse variance weighted	68	0.00751147	1.01385	1.00368	1.02412
	Simple mode	68	0.176056	1.01664	0.992876	1.04096
	Weighted mode	68	0.346698	1.00705	0.992527	1.02178
	MRConMix	68	0.0102093	1.01648	0.817955	1.2632
