# Supplementary material for: Cross-disorder genomic structural equation modeling reveals common genetic basis of neuroimmune diseases
Source: Research Square preprint supplement (doi:10.21203/rs.3.rs-7328766/v1), 2025-08-22
Supplement: Supplementary file 6 [file d4b994e2536e2ee6c9f672e8.xlsx]

## Sheet: Sheet1
GenomicLocus	uniqID	rsID	chr	pos	p	start	end	nSNPs	nGWASSNPs	nIndSigSNPs	IndSigSNPs	nLeadSNPs	LeadSNPs
1	1:19413544:A:C	rs55710223	1	19413544	3.0588292767e-63	19413544	19435066	2	2	1	rs55710223	1	rs55710223
2	1:27471887:C:T	rs76692181	1	27471887	1e-200	27471887	27471887	1	1	1	rs76692181	1	rs76692181
3	1:27901368:C:T	rs78542455	1	27901368	2.37061272336e-139	27887383	27901368	2	1	1	rs78542455	1	rs78542455
4	1:85738953:A:G	rs114362702	1	85738953	1.84515916763e-173	85738953	85738953	1	1	1	rs114362702	1	rs114362702
5	1:220827883:A:G	rs111996812	1	220827883	1.34479711423e-169	220827883	220827883	1	1	1	rs111996812	1	rs111996812
6	2:5577275:G:T	rs73913776	2	5577275	3.05226828192e-65	5577275	5577275	1	1	1	rs73913776	1	rs73913776
7	2:51453952:A:G	rs72832112	2	51453952	1e-200	51453952	51453952	1	1	1	rs72832112	1	rs72832112
8	2:109761834:C:G	rs146179548	2	109761834	1e-200	109721758	109761834	2	1	1	rs146179548	1	rs146179548
9	2:198639353:C:T	rs77952266	2	198639353	1.08228018205e-45	198195671	199202305	12	1	1	rs77952266	1	rs77952266
10	3:29434041:C:T	rs141245276	3	29434041	1e-200	29434041	29434041	1	1	1	rs141245276	1	rs141245276
11	3:143296624:A:G	rs6776465	3	143296624	1e-200	143296624	143296624	1	1	1	rs6776465	1	rs6776465
12	4:7532184:C:T	rs151224098	4	7532184	1e-200	7510165	7532184	2	1	1	rs151224098	1	rs151224098
13	4:56284631:C:T	rs564762	4	56284631	2.57770067606e-10	56228814	56470701	38	8	1	rs564762	1	rs564762
14	4:60375095:C:T	rs4392532	4	60375095	3.5946848154e-15	60339057	60375095	5	1	1	rs4392532	1	rs4392532
15	4:76905472:A:G	rs7436021	4	76905472	1.83352106824e-10	76848816	76991310	60	2	1	rs7436021	1	rs7436021
16	4:177254572:A:G	rs10029041	4	177254572	1e-200	177253164	177261268	7	2	1	rs10029041	1	rs10029041
17	5:16057480:A:G	rs115385547	5	16057480	1.14455698976e-198	16057480	16057480	1	1	1	rs115385547	1	rs115385547
18	5:19866975:C:T	rs180690604	5	19866975	1e-200	19866975	19866975	1	1	1	rs180690604	1	rs180690604
19	7:133454333:A:C	rs1895024	7	133454333	6.78360397441e-29	133298906	133615703	46	1	1	rs1895024	1	rs1895024
20	8:17213764:C:T	rs35642230	8	17213764	3.04251266924e-15	17199428	17224509	9	1	1	rs35642230	1	rs35642230
21	8:102536405:A:G	rs10955255	8	102536405	5.41371556406e-12	102536405	102537178	2	1	1	rs10955255	1	rs10955255
22	8:106021780:C:T	rs9297354	8	106021780	2.1454864574e-09	106000442	106026745	4	1	1	rs9297354	1	rs9297354
23	8:107408282:C:T	rs72678550	8	107408282	8.93364220903e-61	107408282	107408282	1	1	1	rs72678550	1	rs72678550
24	9:102811758:A:T	rs55691991	9	102811758	1e-200	102811758	102811758	1	1	1	rs55691991	1	rs55691991
25	11:39926692:C:T	rs71482185	11	39926692	1e-200	39926692	39926692	1	1	1	rs71482185	1	rs71482185
26	12:109618591:G:T	rs73191114	12	109618591	1e-200	109535772	109672603	22	8	1	rs73191114	1	rs73191114
27	13:56825502:A:G	rs9537344	13	56825502	2.83244135869e-22	56719658	56987962	8	1	1	rs9537344	1	rs9537344
28	14:32428667:A:G	rs17098406	14	32428667	1e-200	32428667	32428667	1	1	1	rs17098406	1	rs17098406
29	15:31677984:C:T	rs4389106	15	31677984	1.25735795043e-22	31677984	31728010	7	1	1	rs4389106	1	rs4389106
30	16:11486668:C:T	rs11074971	16	11486668	1.23382081453e-129	11486668	11486668	1	1	1	rs11074971	1	rs11074971
31	16:90081235:A:G	rs34891292	16	90081235	3.79469803714e-96	90081235	90081235	1	1	1	rs34891292	1	rs34891292
32	17:65584101:C:T	rs76210604	17	65584101	1e-200	65584101	65604606	3	1	1	rs76210604	1	rs76210604
33	19:33149523:A:G	rs77511911	19	33149523	5.98755207319e-104	33149523	33346402	3	1	1	rs77511911	1	rs77511911
34	19:49672829:C:T	rs148729815	19	49672829	1e-200	49666461	49688188	17	2	1	rs148729815	1	rs148729815
35	21:45289700:C:T	rs1573474	21	45289700	1.65384441058e-20	45289700	45357966	7	1	1	rs1573474	1	rs1573474
36	22:27334160:C:T	rs6005244	22	27334160	4.05419883171e-08	27328156	27334160	6	1	1	rs6005244	1	rs6005244
