# Supplementary material for: Cross-disorder genomic structural equation modeling reveals common genetic basis of neuroimmune diseases
Source: Research Square preprint supplement (doi:10.21203/rs.3.rs-7328766/v1), 2025-08-22
Supplement: Supplementary file 7 [file dac033175534c468f3d51fe7.xlsx]

## Sheet: Sheet1
SNP	CHR	BP	eaf	effect_allele	other_allele	beta	se	pval	N
rs148729815	19	49672829	0.0188867	C	T	-8.90364	0.275643157537832	1e-200	90816.3008057297
rs76210604	17	65584101	0.0218688	C	T	7.94121180188124	0.205065004324119	1e-200	90816.3008057297
rs17098406	14	32428667	0.0198807	G	A	8.63005108716319	0.276787892116797	1e-200	90816.3008057297
rs73195472	12	109550710	0.0228628	C	G	-5.57493	0.172341565389419	1e-200	90816.3008057297
rs73197474	12	109589768	0.0228628	C	T	-6.09631	0.194900728162214	1e-200	90816.3008057297
rs73191114	12	109618591	0.0218688	G	T	-5.06604	0.164023795274301	1e-200	90816.3008057297
rs71482185	11	39926692	0.0218688	C	T	8.52825130024925	0.27209796298607	1e-200	90816.3008057297
rs55691991	9	102811758	0.0208748	T	A	7.70948261398962	0.181695461625582	1e-200	90816.3008057297
rs180690604	5	19866975	0.0218688	C	T	7.82270510219294	0.207554508914354	1e-200	90816.3008057297
rs10029041	4	177254572	0.0198807	G	A	-8.3051	0.223163083086072	1e-200	90816.3008057297
rs151224098	4	7532184	0.0149105	T	C	-8.11404	0.234911831451369	1e-200	90816.3008057297
rs6776465	3	143296624	0.0228628	A	G	7.56398109688338	0.171058747174286	1e-200	90816.3008057297
rs141245276	3	29434041	0.0228628	C	T	-8.48002	0.265037564539242	1e-200	90816.3008057297
rs146179548	2	109761834	0.0198807	G	C	-8.43231	0.242311048170223	1e-200	90816.3008057297
rs72832112	2	51453952	0.0208748	G	A	7.37108942159423	0.158608815568253	1e-200	90816.3008057297
rs76692181	1	27471887	0.0168986	T	C	-8.00892	0.207246271523607	1e-200	90816.3008057297
rs115385547	5	16057480	0.0198807	A	G	-8.78588	0.292166718403719	1.14455698975667e-198	90816.3008057297
rs114362702	1	85738953	0.0208748	A	G	-9.22121	0.328420137607755	1.84515916762595e-173	90816.3008057297
rs111996812	1	220827883	0.0208748	G	A	4.7520628964142	0.171188002504906	1.34479711422966e-169	90816.3008057297
rs56358165	12	109610802	0.0218688	C	T	-3.88	0.145528210499674	1.31687918939406e-156	90816.3008057297
rs3219236	12	109541013	0.0218688	G	A	-3.55074	0.138901018889459	3.92388578629307e-144	90816.3008057297
rs78542455	1	27901368	0.0198807	C	T	5.19076653558578	0.206561041843464	2.37061272336246e-139	90816.3008057297
rs7664257	4	177255114	0.0198807	C	G	-4.90053	0.198426913493878	1.15519977637487e-134	90816.3008057297
rs11074971	16	11486668	0.017893	C	T	-9.96421	0.411331191794901	1.23382081453097e-129	90816.3008057297
rs192783877	12	109561263	0.0218688	G	A	-3.59782	0.159738226436083	2.45918265392003e-112	90816.3008057297
rs11065662	12	109580045	0.0228628	C	T	-3.69305	0.168075484837571	5.27322981344155e-107	90816.3008057297
rs77511911	19	33149523	0.0228628	G	A	10.2514201855179	0.473491587780626	5.98755207318721e-104	90816.3008057297
rs113159745	19	49671771	0.0188867	C	T	-10.6217	0.504354574444846	1.850710576419e-98	90816.3008057297
rs34891292	16	90081235	0.0228628	G	A	-10.5114	0.50520414934808	3.7946980371384e-96	90816.3008057297
rs11832399	12	109535772	0.0218688	C	T	-3.14986	0.156439388504745	3.66600114740659e-90	90816.3008057297
rs73913776	2	5577275	0.0218688	T	G	-11.2451	0.659231593773041	3.05226828191744e-65	90816.3008057297
rs55710223	1	19413544	0.0208748	A	C	-11.3789	0.677859133972983	3.05882927670463e-63	90816.3008057297
rs72678550	8	107408282	0.0159046	C	T	11.4709374600708	0.697483651836622	8.93364220903212e-61	90816.3008057297
rs114288128	1	19435066	0.0208748	T	C	-11.5301	0.716767706974239	3.18591709707302e-58	90816.3008057297
rs77952266	2	198639353	0.0139165	T	C	-10.0958	0.71155871444932	1.08228018204745e-45	90816.3008057297
rs1895024	7	133454333	0.0924453	C	A	0.459899806143592	0.0412288262070145	6.78360397441457e-29	90816.3008057297
rs4389106	15	31677984	0.092445	T	C	-0.571179	0.058350004404078	1.25735795042945e-22	90816.3008057297
rs9537344	13	56825502	0.090457	G	A	0.385412118322367	0.0397071307864622	2.83244135868566e-22	90816.3008057297
rs1573474	21	45289700	0.203777	T	C	0.170301231316123	0.0183462754774271	1.65384441058273e-20	90816.3008057297
